# Supplementary material for: A multisectoral approach to advance health equity in rural northern Arizona: county-level leaders’ perspectives on health equity
Source: Springer Nature journal article supplement (doi:10.1186/s12889-022-13279-6), 2022-05-13

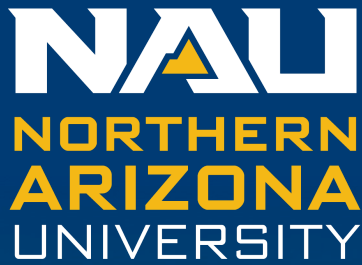

## INTRODUCTION

---

### Regional Health Equity Survey

You are being asked to participate in this 20-minute survey because you have been identified as a leader in your field which may include health, housing, transportation, planning, justice, grassroots organizing, and policy among many other areas important to community well-being. We at the Northern Arizona University (NAU), Center for Health Equity Research (CHER) will survey approximately 300 community, organizational, and university leaders from across 7 counties and 14 Native Nations in Arizona.

We aim to assess our regional and collective capacity to address the root causes of health inequity. Health inequities are caused by the underlying social inequalities which create different conditions in which people are born, grow, live, work, and age.

**Participation is voluntary and all individual responses will remain confidential.** You will receive a \$10 gift card upon completion of the survey. You may skip any question you do not want to answer. You may complete the survey in multiple sessions. Use the buttons at the bottom of the survey to navigate through the survey. Do not use your browser's back button.

#### **Benefits to participants:**

- **Establish a baseline of Northern Arizona counties and Native Nations organizational capacity to address health equity.**
- **Develop county- or Native Nation-level reports to advance collective impact strategic planning.**

- **NAU-CHER learns how to best support regional capacity to impact health inequity through tailored research/evaluation, advocacy, policy, and workforce development and training.**

We thank you for your time and expertise.

**For questions please contact:**

Mark Remiker  
Program Coordinator, Sr.  
Northern Arizona University  
Center for Health Equity Research  
mark.remiker@nau.edu  
(928) 523-4295

Funding supported by NIH/NIHMD RCMI U54MD012388

---

**PERSONAL**

---

Which best describes the primary organization you work for?

- |                                                |                                                    |
|------------------------------------------------|----------------------------------------------------|
| <input type="radio"/> County agency            | <input type="radio"/> Academic institution         |
| <input type="radio"/> Tribal agency            | <input type="radio"/> Private sector business      |
| <input type="radio"/> State-level agency       | <input type="radio"/> Community-based organization |
| <input type="radio"/> Federal agency           | <input type="radio"/> Community group/coalition    |
| <input type="radio"/> Faith-based organization | <input type="radio"/> Other                        |

---

What county do you work for? If you work for more than one county, please list the primary.

- Apache
- Coconino
- Mohave
- Navajo

- Yavapai
  - Yuma
  - Other
- 

What tribe do you work for? If you work for more than one tribe, please list the primary.

- |                                     |                                                |
|-------------------------------------|------------------------------------------------|
| <input type="radio"/> Cocopah       | <input type="radio"/> San Carlos Apache        |
| <input type="radio"/> Ft. Mojave    | <input type="radio"/> San Juan Southern Paiute |
| <input type="radio"/> Havasupai     | <input type="radio"/> Tonto Apache             |
| <input type="radio"/> Hopi          | <input type="radio"/> White Mountain Apache    |
| <input type="radio"/> Hualapai      | <input type="radio"/> Yavapai Apache           |
| <input type="radio"/> Kaibab Paiute | <input type="radio"/> Yavapai Prescott         |
| <input type="radio"/> Navajo        | <input type="radio"/> Other                    |
| <input type="radio"/> Quechan       | <input type="text"/>                           |
- 

With which sector/area does your work most closely align? *check all that apply*

- |                                                             |                                                                         |
|-------------------------------------------------------------|-------------------------------------------------------------------------|
| <input type="checkbox"/> Community and economic development | <input type="checkbox"/> Food systems                                   |
| <input type="checkbox"/> Health and human services          | <input type="checkbox"/> Housing                                        |
| <input type="checkbox"/> Law, justice, and public safety    | <input type="checkbox"/> Education                                      |
| <input type="checkbox"/> Parks and recreation               | <input type="checkbox"/> Arts, music, and culture                       |
| <input type="checkbox"/> Policy                             | <input type="checkbox"/> Planning and zoning                            |
| <input type="checkbox"/> Early childhood development        | <input type="checkbox"/> Cultural resources management and preservation |
| <input type="checkbox"/> Transportation                     | <input type="checkbox"/> Other                                          |
|                                                             | <input type="text"/>                                                    |
- 

What is your current position or title?

---

How long have you been in your current position? (Please enter the number of months only if it has been less than one year. Otherwise, answer in years only.)

Months

Years

---

How long have you worked in your field or sector? (Please enter the number of months only if it has been less than one year. Otherwise, answer in years only.)

Months

Years

---

How would you describe the primary community you serve?

---

What is your primary service area? (e.g., city, county, district, region, etc.)

---

Do you work directly with community residents in your current position?

Yes

No

---

Do you supervise staff members who work directly with community residents?

Yes

No

---

## DEFINITIONS

---

Throughout this assessment, we will use terms related to health inequity that may be unfamiliar to you. By clicking on the link below, you will open up a new window that includes written definitions and examples of some of these terms. If needed, you can leave this window open and refer to these definitions as you take the survey.

### [SURVEY DEFINITIONS](#)

---

## COMMUNITY

---

The next set of questions will ask about the well being of the community you serve.

---

To begin, what are the **root causes** of health inequity, or the primary social, environmental, or economic conditions that impact the community you serve?

---

In your position, what strategies have you found to be successful in overcoming these challenges?

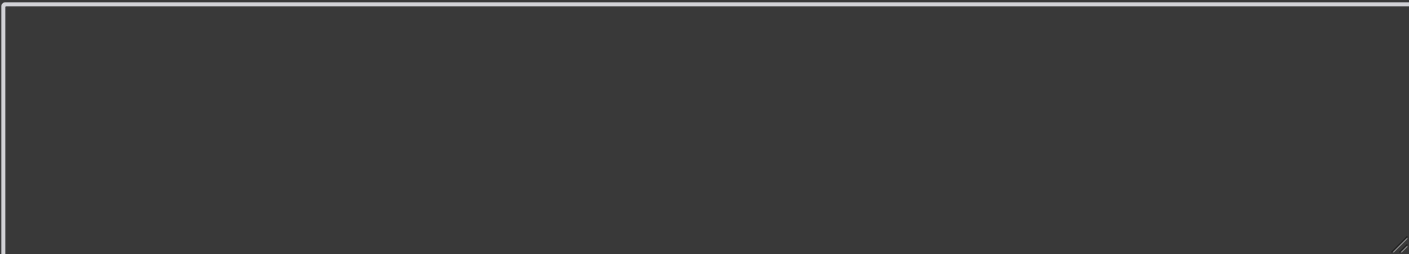

How uneven is the distribution of these resources and services in the community you serve?

|                                  | Very uneven           | Somewhat uneven       | Not at all uneven     |
|----------------------------------|-----------------------|-----------------------|-----------------------|
| Legal/justice services           | <input type="radio"/> | <input type="radio"/> | <input type="radio"/> |
| Health care coverage             | <input type="radio"/> | <input type="radio"/> | <input type="radio"/> |
| Adult education                  | <input type="radio"/> | <input type="radio"/> | <input type="radio"/> |
| Mental health services           | <input type="radio"/> | <input type="radio"/> | <input type="radio"/> |
| Children's education             | <input type="radio"/> | <input type="radio"/> | <input type="radio"/> |
| Employment                       | <input type="radio"/> | <input type="radio"/> | <input type="radio"/> |
|                                  | Very uneven           | Somewhat uneven       | Not at all uneven     |
| Substance abuse services         | <input type="radio"/> | <input type="radio"/> | <input type="radio"/> |
| Food security                    | <input type="radio"/> | <input type="radio"/> | <input type="radio"/> |
| Civic engagement                 | <input type="radio"/> | <input type="radio"/> | <input type="radio"/> |
| Relationships and social support | <input type="radio"/> | <input type="radio"/> | <input type="radio"/> |
| Income                           | <input type="radio"/> | <input type="radio"/> | <input type="radio"/> |
| Childcare                        | <input type="radio"/> | <input type="radio"/> | <input type="radio"/> |
|                                  | Very uneven           | Somewhat uneven       | Not at all uneven     |
| Housing                          | <input type="radio"/> | <input type="radio"/> | <input type="radio"/> |
| Mobility/transportation          | <input type="radio"/> | <input type="radio"/> | <input type="radio"/> |
| Public safety                    | <input type="radio"/> | <input type="radio"/> | <input type="radio"/> |
| Disability services              | <input type="radio"/> | <input type="radio"/> | <input type="radio"/> |
| Power                            | <input type="radio"/> | <input type="radio"/> | <input type="radio"/> |
| Wealth                           | <input type="radio"/> | <input type="radio"/> | <input type="radio"/> |
|                                  | Very uneven           | Somewhat uneven       | Not at all uneven     |
| Primary care services            | <input type="radio"/> | <input type="radio"/> | <input type="radio"/> |

|                               | Very uneven           | Somewhat uneven       | Not at all uneven     |
|-------------------------------|-----------------------|-----------------------|-----------------------|
| Technology/internet           | <input type="radio"/> | <input type="radio"/> | <input type="radio"/> |
| Other<br><input type="text"/> | <input type="radio"/> | <input type="radio"/> | <input type="radio"/> |

---

## ORGANIZATION

---

This section of questions relates to how your organizational culture and strategic planning processes focus on addressing the root causes of inequity in community you serve.

[Click here for definitions](#)

---

In your opinion, how much does your organization focus on addressing the **root causes of inequity** in the community you serve?

- There is no focus on the root causes of inequity.
  - There is not enough focus on the root causes of inequity.
  - There is about the right amount of focus on the root causes of inequity.
  - There is too much focus on the root causes of inequity.
  - I don't know.
- 

Does your organization's strategic plan include a commitment to addressing the **root causes of inequity** in the community you serve?

- Yes
  - No
  - I don't know whether the strategic plan addresses the root causes of inequity.
  - I don't know whether there is a strategic plan for my organization.
  - Not applicable: There is not a strategic plan for my organization.
-

Does your organization's mission statement express a commitment to addressing the **root causes of inequity** in the community you serve?

- Yes
  - No
  - I don't know whether the mission statement addresses the root causes of inequity.
  - I don't know whether my organization has a mission statement.
  - Not applicable: There is not a mission statement for my organization.
- 

For each of the following statements, please indicate the response that most closely describes your organization.

My organization...

|                                                                                                                                                                                                    | No                    | Moving in that direction | Yes                   | Don't know            |
|----------------------------------------------------------------------------------------------------------------------------------------------------------------------------------------------------|-----------------------|--------------------------|-----------------------|-----------------------|
| Makes deliberate efforts to build the leadership capacity of community members to advocate on issues affecting the environmental, social, and economic conditions.                                 | <input type="radio"/> | <input type="radio"/>    | <input type="radio"/> | <input type="radio"/> |
| Demonstrates a commitment to addressing environmental, social, and economic conditions that impact health.                                                                                         | <input type="radio"/> | <input type="radio"/>    | <input type="radio"/> | <input type="radio"/> |
| Has strategies in place to minimize barriers to community participation (e.g., it is possible to provide money for child care and transportation to residents attending community meetings, etc.). | <input type="radio"/> | <input type="radio"/>    | <input type="radio"/> | <input type="radio"/> |
|                                                                                                                                                                                                    | No                    | Moving in that direction | Yes                   | Don't know            |
| Uses data to make decisions about how to distribute resources and services within the community we serve.                                                                                          | <input type="radio"/> | <input type="radio"/>    | <input type="radio"/> | <input type="radio"/> |



|                                                                                                                                                              | No                    | Moving in that direction | Yes                   | Don't know            |
|--------------------------------------------------------------------------------------------------------------------------------------------------------------|-----------------------|--------------------------|-----------------------|-----------------------|
| Demonstrates a commitment to working with external partners, policy-makers, and community members to address environmental, social, and economic conditions. | <input type="radio"/> | <input type="radio"/>    | <input type="radio"/> | <input type="radio"/> |
| Has strategies in place to advocate for public policies that address environmental, social, and/or economic conditions.                                      | <input type="radio"/> | <input type="radio"/>    | <input type="radio"/> | <input type="radio"/> |

---

In your current position, have you ever received training about the different ways to address environmental, social, and economic conditions that impact the community you serve?

- Yes
  - No
  - I don't remember
- 

What is the name of the training you received?

How useful was your training in helping you address environmental, social, and economic conditions that impact the community you serve?

- Very useful
  - Somewhat useful
  - Neither useful nor useless
  - Somewhat useless
  - Very useless
-

What role do you have in making decisions that affect your organization's efforts to address the [root causes of inequity](#) in the community you serve?

- I have no decision-making role.
- There are opportunities for me to give input, but I don't have a role in seeing that my input is incorporated into the decision.
- I have an active role in major decisions affecting my organization's efforts to address the root causes of inequity in the community we serve.
- I have primary decision-making power for my organization.
- Addressing the root causes of inequity in the community we serve is not a focus of my organization.
- Other

---

## EXPERIENCES

---

For the next set of questions we are interested in learning about your personal knowledge and experience related to the social determinants of health which include aspects of the environmental, social, and economic conditions that impact health.

[Click here for definitions](#)

---

Please indicate how much you agree or disagree with the following statements:

|                                                                                                | Strongly disagree     | Disagree              | Neutral               | Agree                 | Strongly agree        |
|------------------------------------------------------------------------------------------------|-----------------------|-----------------------|-----------------------|-----------------------|-----------------------|
| Being aware of my own beliefs, values, and privilege helps me understand others' perspectives. | <input type="radio"/> | <input type="radio"/> | <input type="radio"/> | <input type="radio"/> | <input type="radio"/> |
| Staff I interact with at my organization are comfortable talking about race and racism         | <input type="radio"/> | <input type="radio"/> | <input type="radio"/> | <input type="radio"/> | <input type="radio"/> |

Staff I interact with at my organization are comfortable talking about discrimination.

Strongly disagree

Disagree

Neutral

Agree

Strongly agree

I believe it is important to understand the beliefs and values of the residents and community members that I serve.

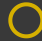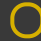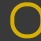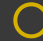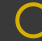

I understand what the environmental, social, and economic conditions are that impact health.

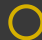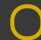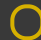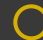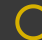

I regularly have meaningful interactions and have learned from people of different cultures and backgrounds from my own.

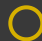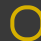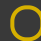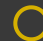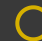

Senior management at my organization are comfortable talking about discrimination.

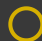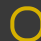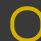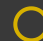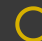

I have taken steps to enhance my own cultural humility, cultural competence, and/or cultural understanding (for example, through trainings, self-reflection, personal relationships, etc).

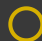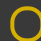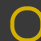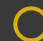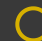

I could explain the environmental, social, and economic conditions that impact health to my co-workers.

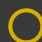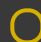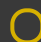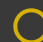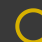

I work with a culturally diverse staff.

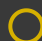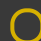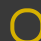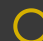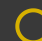

In general, my organization's programs are structured to address the environmental, social, and economic inequalities in our community.

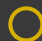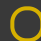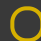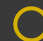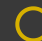

Senior management at my organization are comfortable talking about race and racism.

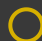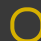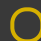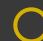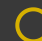

Please indicate how much you agree or disagree with the following statements about the opportunities you have to reflect on addressing health inequities in your work:

Strongly

Strongly

|                                                                                                                                                                                     | Strongly disagree     | Disagree              | Neutral               | Agree                 | Strongly agree        |
|-------------------------------------------------------------------------------------------------------------------------------------------------------------------------------------|-----------------------|-----------------------|-----------------------|-----------------------|-----------------------|
| I subscribe to a listserv, online discussion group, e-mail list, or other web-based source for learning about developments on the topic of health inequities on an ongoing basis.   | <input type="radio"/> | <input type="radio"/> | <input type="radio"/> | <input type="radio"/> | <input type="radio"/> |
| Staff are encouraged to learn about ways to address the environmental, social, and economic conditions that impact health <b>from one another</b> .                                 | <input type="radio"/> | <input type="radio"/> | <input type="radio"/> | <input type="radio"/> | <input type="radio"/> |
| Staff are encouraged to learn about ways to address the environmental, social, and economic conditions that impact health <b>from external sources</b> .                            | <input type="radio"/> | <input type="radio"/> | <input type="radio"/> | <input type="radio"/> | <input type="radio"/> |
| Within my organization, we have engaged in group discussions about how our work could address one or more of the environmental, social, and economic conditions that impact health. | <input type="radio"/> | <input type="radio"/> | <input type="radio"/> | <input type="radio"/> | <input type="radio"/> |

## PARTNERSHIPS

The next section will ask you about the extent that your organization collaborates with other public agencies, institutions, and community-based organizations on the **root causes of health inequities**.

**[Click here for definitions](#)**

To what extent does your organization partner with public agencies, institutions, or community-based organizations on the following issues?

|               | None                  | Some                  | A lot                 |
|---------------|-----------------------|-----------------------|-----------------------|
| Food security | <input type="radio"/> | <input type="radio"/> | <input type="radio"/> |

|                                                                                 |                       |                       |                       |
|---------------------------------------------------------------------------------|-----------------------|-----------------------|-----------------------|
|                                                                                 | None                  | Some                  | A lot                 |
| Land-use planning                                                               | <input type="radio"/> | <input type="radio"/> | <input type="radio"/> |
| Community safety and violence prevention                                        | <input type="radio"/> | <input type="radio"/> | <input type="radio"/> |
| Early childhood development and education                                       | <input type="radio"/> | <input type="radio"/> | <input type="radio"/> |
| Transportation                                                                  | <input type="radio"/> | <input type="radio"/> | <input type="radio"/> |
|                                                                                 | None                  | Some                  | A lot                 |
| Community economic development (e.g., job creation, business development, etc.) | <input type="radio"/> | <input type="radio"/> | <input type="radio"/> |
| Availability of quality affordable housing                                      | <input type="radio"/> | <input type="radio"/> | <input type="radio"/> |
| Racial justice                                                                  | <input type="radio"/> | <input type="radio"/> | <input type="radio"/> |
| Quality public education                                                        | <input type="radio"/> | <input type="radio"/> | <input type="radio"/> |
| Environmental justice                                                           | <input type="radio"/> | <input type="radio"/> | <input type="radio"/> |
|                                                                                 | None                  | Some                  | A lot                 |
| Arts and culture                                                                | <input type="radio"/> | <input type="radio"/> | <input type="radio"/> |
| Recreation opportunities, parks, and open space                                 | <input type="radio"/> | <input type="radio"/> | <input type="radio"/> |
| Youth development and leadership                                                | <input type="radio"/> | <input type="radio"/> | <input type="radio"/> |

In your current position, please indicate which of the following **SECTORS** you have partnered with in the past and which **SECTORS** you would like to partner with in the future to address the environmental, social, and economic conditions that impact health.

|                                                | In the <b>PAST</b> , I have partnered with the following <b>SECTORS</b> | In the <b>FUTURE</b> , I would like to partner with the following <b>SECTORS</b> |
|------------------------------------------------|-------------------------------------------------------------------------|----------------------------------------------------------------------------------|
|                                                | Check all that apply                                                    | Check all that apply                                                             |
| Cultural resources management and preservation | <input type="checkbox"/>                                                | <input type="checkbox"/>                                                         |
| Health and human services                      | <input type="checkbox"/>                                                | <input type="checkbox"/>                                                         |
| Parks and recreation                           | <input type="checkbox"/>                                                | <input type="checkbox"/>                                                         |
| Education                                      | <input type="checkbox"/>                                                | <input type="checkbox"/>                                                         |
| Arts, music, and culture                       | <input type="checkbox"/>                                                | <input type="checkbox"/>                                                         |

|                                    | In the <b>PAST</b> , I have partnered with the following <b>SECTORS</b> | In the <b>FUTURE</b> , I would like to partner with the following <b>SECTORS</b> |
|------------------------------------|-------------------------------------------------------------------------|----------------------------------------------------------------------------------|
|                                    | Check all that apply                                                    | Check all that apply                                                             |
| Housing                            | <input type="checkbox"/>                                                | <input type="checkbox"/>                                                         |
| Policy                             | <input type="checkbox"/>                                                | <input type="checkbox"/>                                                         |
| Early childhood development        | <input type="checkbox"/>                                                | <input type="checkbox"/>                                                         |
|                                    | Check all that apply                                                    | Check all that apply                                                             |
| Planning and zoning                | <input type="checkbox"/>                                                | <input type="checkbox"/>                                                         |
| Law, justice, and public safety    | <input type="checkbox"/>                                                | <input type="checkbox"/>                                                         |
| Food systems                       | <input type="checkbox"/>                                                | <input type="checkbox"/>                                                         |
| Transportation                     | <input type="checkbox"/>                                                | <input type="checkbox"/>                                                         |
| Community and economic development | <input type="checkbox"/>                                                | <input type="checkbox"/>                                                         |
| Other                              | <input type="checkbox"/>                                                | <input type="checkbox"/>                                                         |
| <input type="text"/>               |                                                                         |                                                                                  |
| Other                              | <input type="checkbox"/>                                                | <input type="checkbox"/>                                                         |
| <input type="text"/>               |                                                                         |                                                                                  |

Please tell us why you'd like to partner with the sectors you listed above.

In your experience, what are **the three most important** elements for developing a successful partnership internal or external to your organization?

- |                                                                      |                                                        |                                                 |
|----------------------------------------------------------------------|--------------------------------------------------------|-------------------------------------------------|
| <input type="checkbox"/> Recognition of different kinds of expertise | <input type="checkbox"/> Accountability/follow-through | <input type="checkbox"/> Transparency           |
| <input type="checkbox"/> Ability to resolve conflict                 | <input type="checkbox"/> Communication                 | <input type="checkbox"/> Shared decision making |
| <input type="checkbox"/> Inclusion                                   | <input type="checkbox"/> Humility                      | <input type="checkbox"/> Trust                  |
| <input type="checkbox"/> Reciprocity                                 | <input type="checkbox"/> Shared vision                 | <input type="checkbox"/> Other                  |
|                                                                      |                                                        | <input type="text"/>                            |

## DATA

---

Next, you'll be asked questions about how you use data to make decisions

---

In your position, do you use data to make decisions about the projects you work on?

- Yes
  - No
- 

What types of data do you typically use to guide your work and/or make decisions?

---

Ideally, how often would you use data to guide your decision making?

- Never
  - Rarely
  - Sometimes
  - Often
  - Always
- 

In reality, how often are you able to use data to make decisions?

- Never
- Rarely
- Sometimes
- Often
- Always

---

Do you have any barriers to using data to make decisions?

- Yes
  - No
- 

What are the biggest barriers to using data? *check all that apply*

- Lack of support from leadership
  - I do not have time
  - Useful data is available, but is outdated
  - I do not have access to data
  - No staff with expertise in analysis
  - Useful data does not exist
  - Other
- 

## INITIATIVES

---

Next we would like to ask you about projects or initiatives in your field that inspire you.

Examples can be real and ongoing in your community or state or national examples you would like to see happen in your community. Please feel free to either type in examples, paste links to websites, or upload reports.

---

**Please paste links or type in examples here**

---

**Upload examples here**



---

In your opinion, what made these initiatives successful?

---

## RESEARCH

---

What role do you think research has in addressing the environmental, social, and economic conditions that impact health in the community you serve?

---

In what areas of research could NAU concentrate support in order to best improve health inequities in your community?

---

Please tell us how concentrating support in these areas would improve health inequalities in your community.

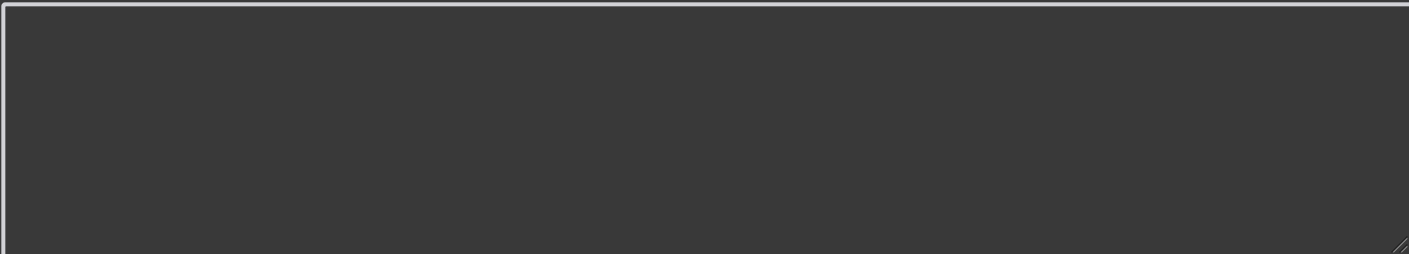

---

## DEMOGRAPHICS

---

You're almost done! We just need to ask you a few more quick questions about yourself. Since we'll be asking you to participate in a follow-up survey in the next few months, we will be asking you to provide us with your name and e-mail address. This information will only be used by our staff. All of your answers will still remain confidential.

---

What is your age?

---

What is your gender identity?

- Male
- Female
- Agender/nonbinary
- Prefer not to answer
- Other

---

What is your race and ethnicity? *check all that apply*

- Black/African American
- American Indian/Alaska Native
- Hispanic/Latino(a)
- White
- Asian/Pacific Islander

- Prefer not to answer
  - Other
- 

What is your tribal affiliation?

- Cocopah
  - Ft. Mohave
  - Havasupai
  - Hopi
  - Hualapai
  - Kaibab Paiute
  - Navajo
  - Quechan
  - San Carlos Apache
  - San Juan Southern Paiute
  - Tonto Apache
  - White Mountain Apache
  - Yavapai Apache
  - Yavapai Prescott
  - Other
- 

What county do you live in?

- Apache
  - Coconino
  - Mohave
  - Navajo
  - Yavapai
  - Yuma
  - Other
- 

What city or town do you live in?

---

Would you be interested in sharing your thoughts about health equity in your community on an NAU health equity podcast?

Yes

No

---

If there is anything else related to the health and well-being of your community that you'd like to address, please share it with us in the space provided below.

---

---

## THANK YOU

---

We thank you for taking the time to complete this survey.

To submit your responses, please click "SUBMIT SURVEY".

Powered by Qualtrics

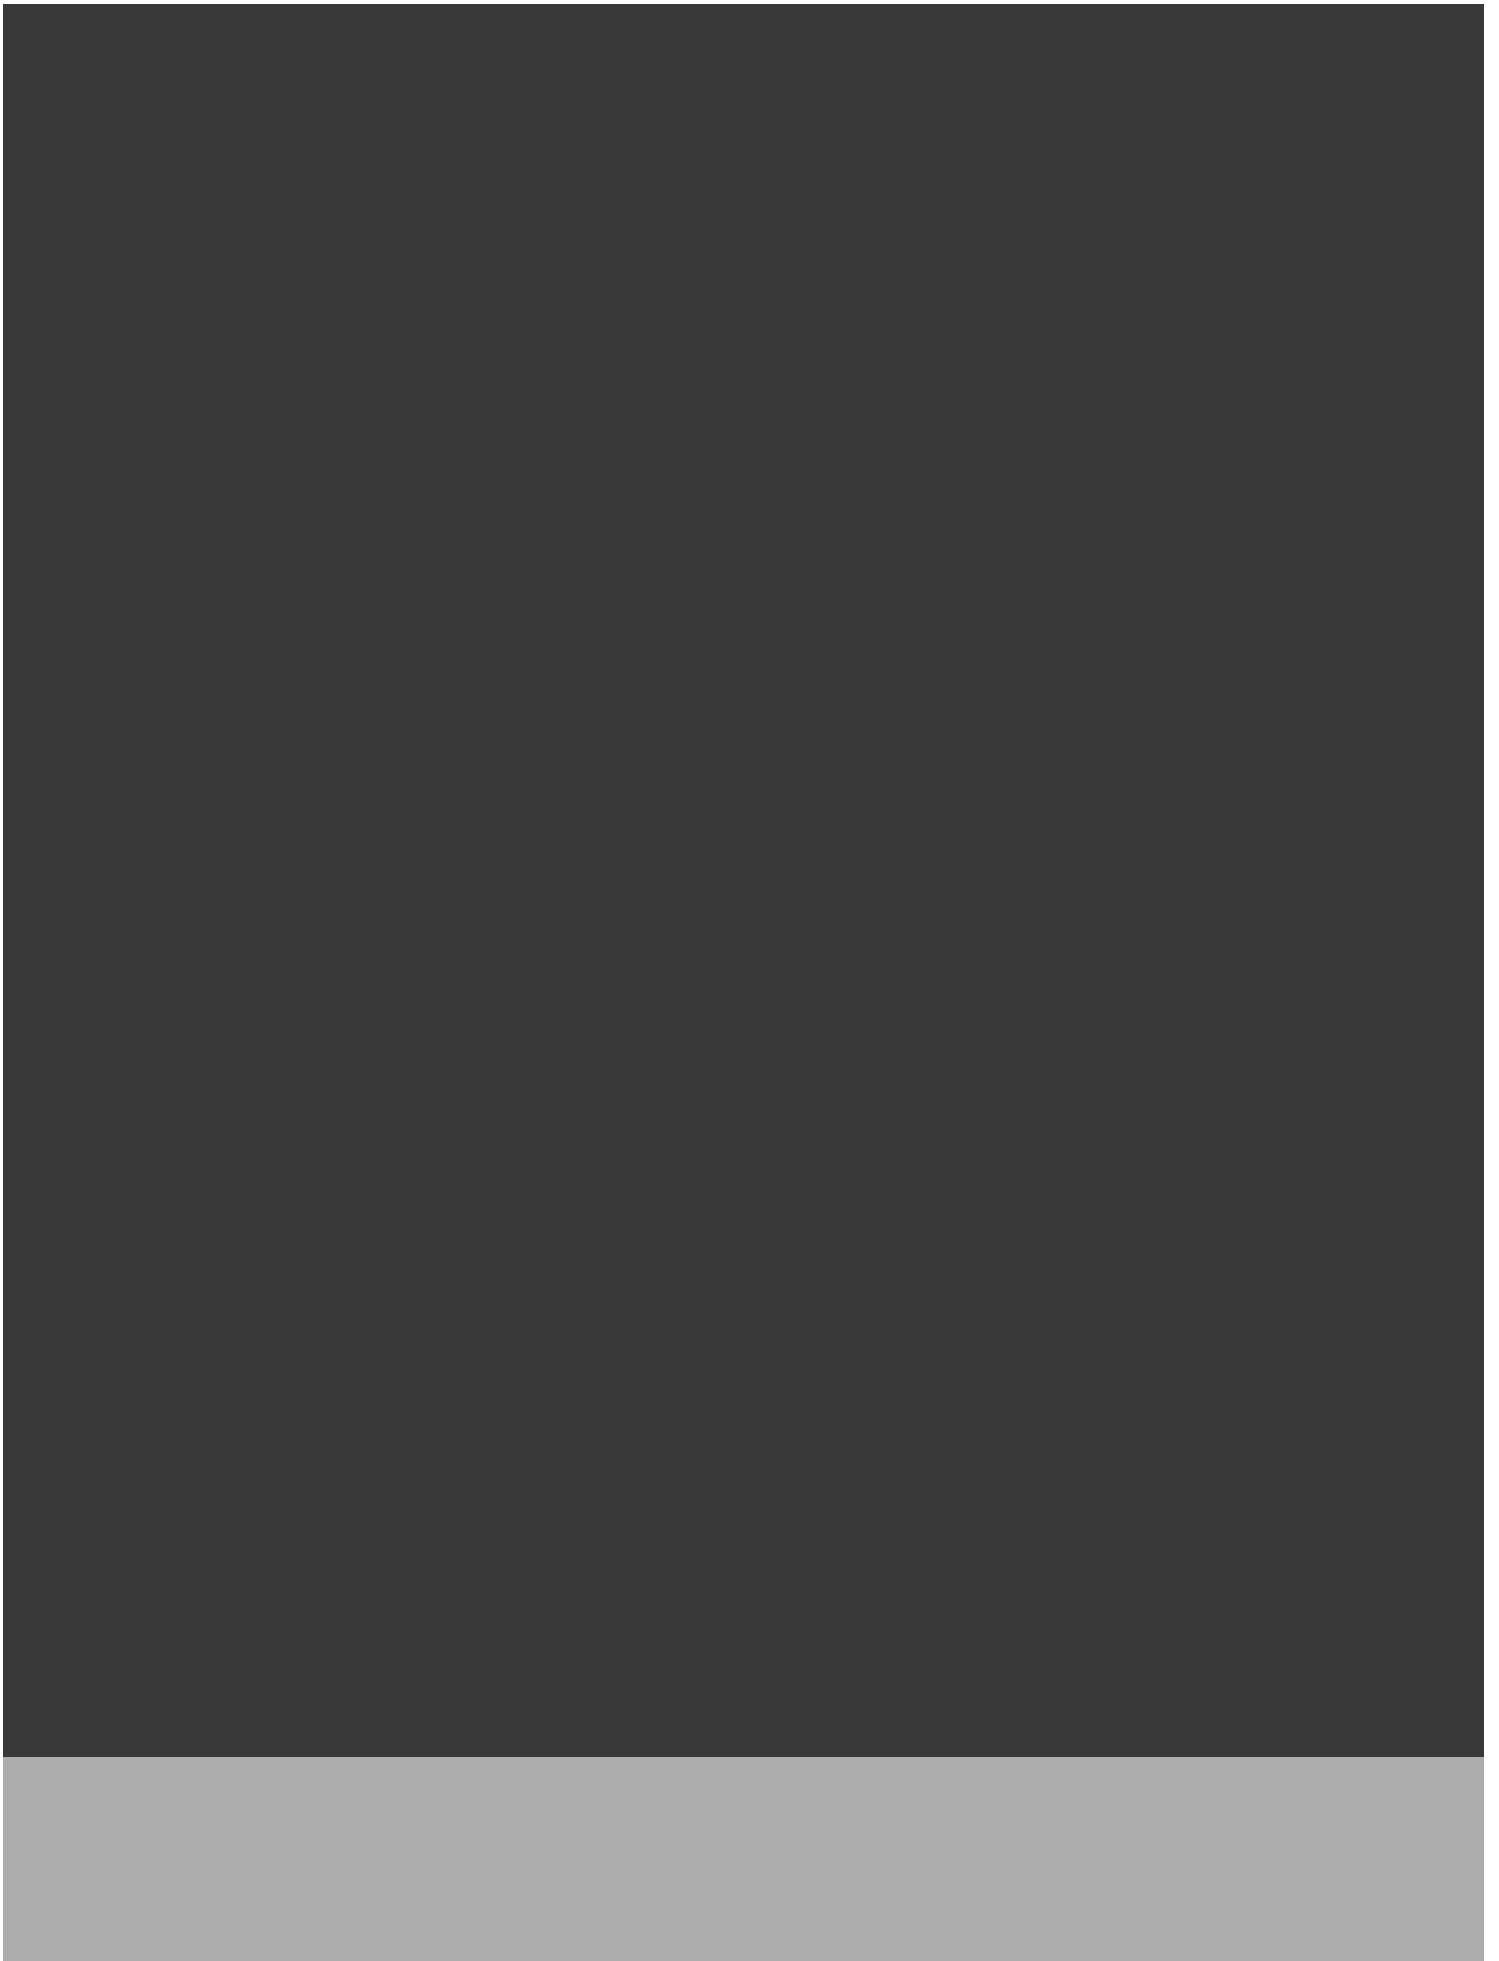

Supplement: MOESM1 [file 20400076]
